# Supplementary material
Source: publisher figshare collection journal article supplement (https://acs.figshare.com/ndownloader/files/4610530)
Supplement: Supplementary file 1 [file 4610530]

## Charge updation before the start of the cross-linking procedure

### Charge updation at amine end terminals

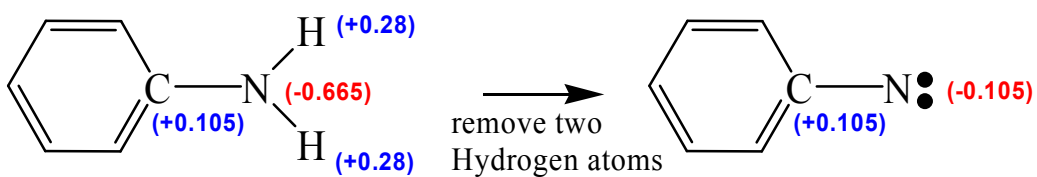

### Charge updation at epoxy end terminals.

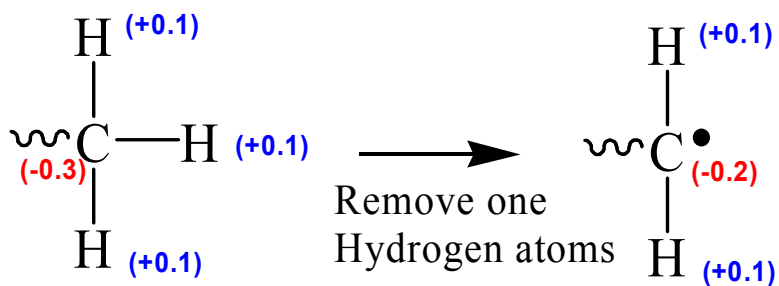

## Charge updation after the cross-linking procedure

**Case 1: When the nitrogen is crosslinked to two epoxy molecules at the end of the cross-linking procedure.**

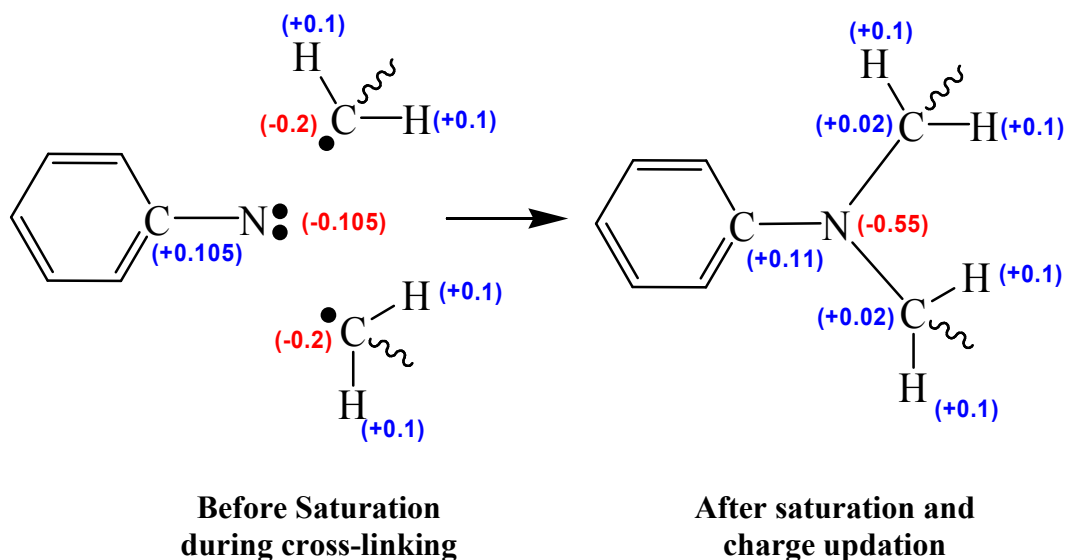

The atoms at which charges were modified are listed below. The modified charges are shown in Table 1.

**Caro:** The phenyl carbon atom which is attached to nitrogen.  
**Nterm:** The amine nitrogen atom of the crosslinker  
**Cterm:** The terminal carbon atom of the epoxy molecule.

**Table 1**

| Atom Type                   | Before Charge Updation   | After Charge Updation     | Net Change |
|-----------------------------|--------------------------|---------------------------|------------|
| Caro                        | +0.105                   | +0.11                     | +0.005     |
| Nterm                       | -0.105                   | -0.55                     | -0.445     |
| Cterm                       | $(-0.2) \times 2 = -0.4$ | $(0.02) \times 2 = +0.04$ | +0.44      |
| Net change in system charge |                          |                           | 0.0        |

The charges on the molecule after updation were calculated separately (as shown in Figure 4) and changes were made accordingly.

**Case 2: When the nitrogen is crosslinked to one epoxy molecule at the end of the cross-linking procedure**

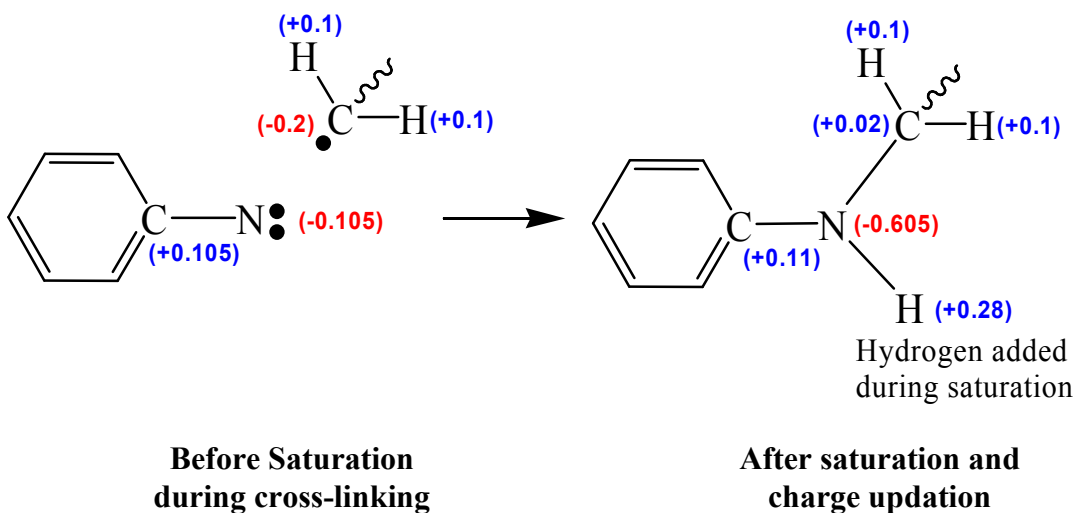

The atoms at which charges were modified are listed below. The modified charges are shown in Table 2.

**Caro:** The phenyl carbon atom which is attached to nitrogen.  
**Nterm:** The amine nitrogen atom of the crosslinker  
**Cterm:** The terminal carbon atom of the epoxy molecule.

**Table 2**

| Atom Type                   | Before Charge Updation | After Charge Updation | Net Change |
|-----------------------------|------------------------|-----------------------|------------|
| Caro                        | +0.105                 | +0.11                 | +0.005     |
| Nterm                       | -0.105                 | -0.61                 | -0.505     |
| Cterm                       | -0.2                   | +0.02                 | +0.22      |
| H                           | -                      | 0.28                  | +0.28      |
| Net change in system charge |                        |                       | 0.0        |

An extra hydrogen atom was added to full-fill the sp<sup>2</sup> nature of the amine nitrogen and a charge of 0.28 was assigned to the hydrogen atom in accordance to the charges of H's in DETDA molecule where amine nitrogen is bonded to hydrogen atoms.

**Case 3: When the nitrogen was not at all reacted during cross-linking process.**

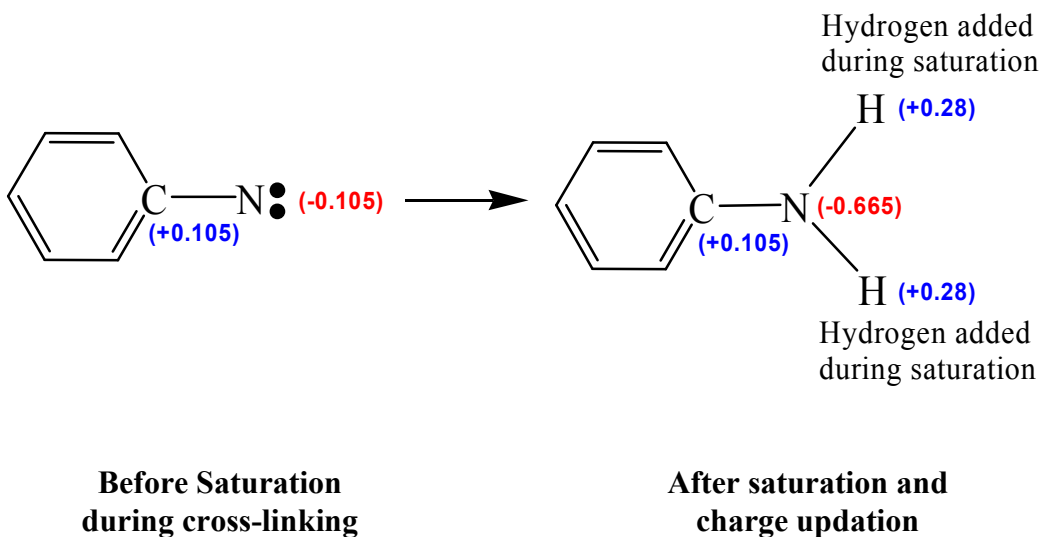

The atoms at which charges were modified are listed below. The modified charges are shown in Table 3.

**Caro:** The phenyl carbon atom which is attached to nitrogen.  
**Nterm:** The amine nitrogen atom of the crosslinker

**Table 3**

| Atom Type                   | Before Charge Updation | After Charge Updation  | Net Change |
|-----------------------------|------------------------|------------------------|------------|
| Caro                        | +0.105                 | +0.105                 | 0          |
| Nterm                       | -0.105                 | -0.665                 | -0.56      |
| H                           | -                      | $0.28 \times 2 = 0.56$ | +0.56      |
| Net change in system charge |                        |                        | 0.0        |

Two hydrogen atoms were added to full-fill the  $sp^2$  nature of the amine nitrogen and a charge of 0.28 was assigned to the hydrogen atoms in accordance to the charges of H's in DETDA molecule where amine nitrogen is bonded to hydrogen atoms.
